# Supplementary material
Source: publisher figshare collection journal article supplement (https://frontiersin.figshare.com/ndownloader/files/23928575)
Supplement: Supplementary file [file 23928575]

## Supplementary Materials

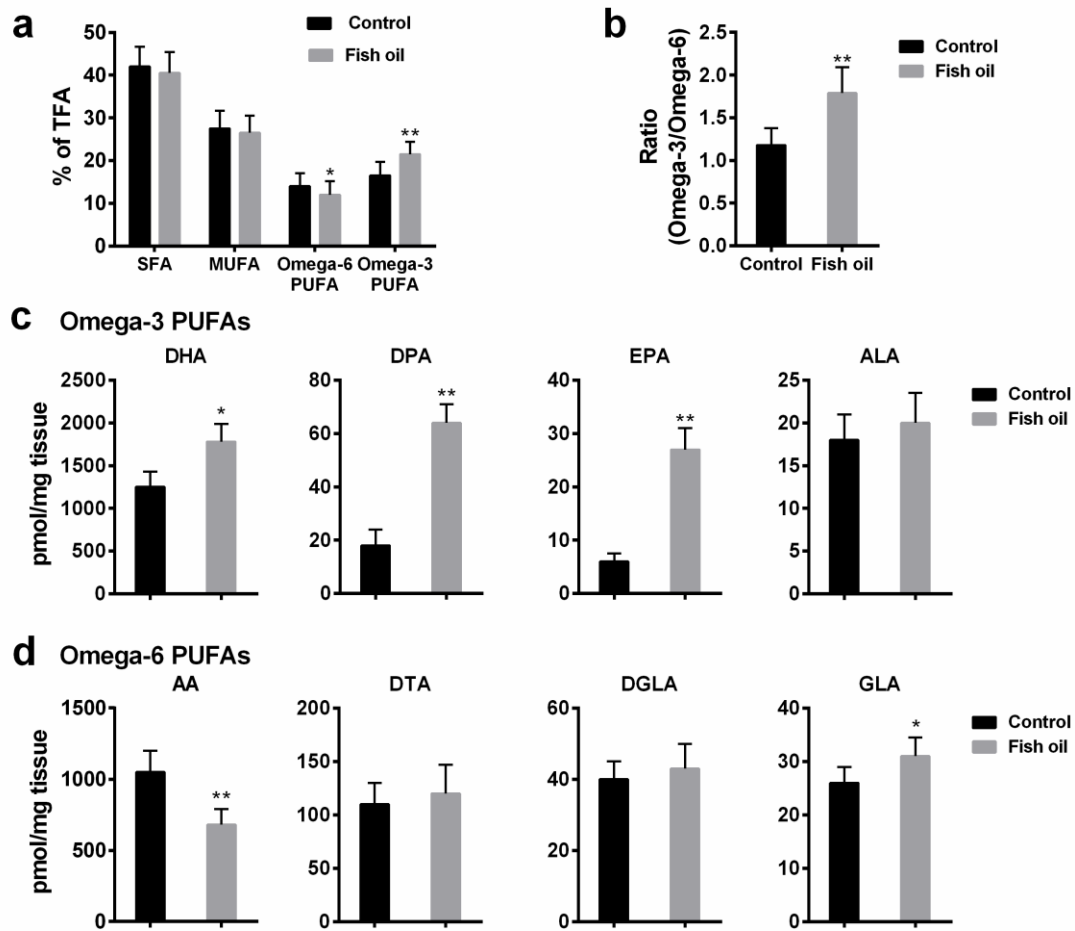

Supplementary Figure S1. Lipid profiles in the brain of the mice on diet supplemented with triple strength omega-3 fish oil and on regular diets. (a) Lipid profiles in mouse brains expressed as the percent of total fatty acids (TFA). (b) The omega-3/omega-6 ratio increased in mice fed with omega-3 enriched diets compared to those on a regular diet. Specific omega-3 PUFAs (c) and omega-6 PUFAs (d) content. Data are presented as mean  $\pm$  SD.  $n = 3$  for each group. \* $p < 0.05$ , \*\* $p < 0.01$  compared with control group.
